# Supplementary material for: Material Properties and Morphology of Prestomal Teeth in Relation to the Feeding Habits of Diptera (Brachycera)
Source: MDPI journal article supplement (doi:10.3390/insects13020207), 2022-02-17
Supplement: s1 [file s1]

**Supplementary Table S1.** ANOVA results of comparisons of the elemental analysis among regions within each species.

| Species                | Element | df    | F       | p value   |
|------------------------|---------|-------|---------|-----------|
| <i>C. vomitoria</i>    | Na      | 2, 15 | 4.0922  | 0.0382*   |
|                        | S       | 2, 15 | 5.3222  | 0.0179*   |
|                        | Ca      | 2, 15 | 3.9706  | 0.0413*   |
|                        | Mg      | 2, 15 | 3.9796  | 0.0411*   |
|                        | P       | 2, 15 | 5.675   | 0.0146*   |
|                        | Cl      | 2, 14 | 0.8766  | 0.4378    |
|                        | K       | 2, 15 | 3.4252  | 0.0595*   |
| <i>L. sericata</i>     | Na      | 2, 15 | 1.1552  | 0.3415    |
|                        | S       | 2, 15 | 2.6557  | 0.1029    |
|                        | Ca      | 2, 15 | 1.334   | 0.2929    |
|                        | Mg      | 2, 15 | 2.4545  | 0.1196    |
|                        | P       | 2, 15 | 12.6332 | 0.0006*   |
|                        | Cl      | 2, 15 | 0.6048  | 0.559     |
|                        | K       | 2, 15 | 7.906   | 0.0045*   |
| <i>Pr. azurea</i>      | Na      | 2, 15 | 2.2829  | 0.1363    |
|                        | S       | 2, 15 | 5.8307  | 0.0134*   |
|                        | Ca      | 2, 15 | 4.0935  | 0.0381*   |
|                        | Mg      | 2, 15 | 9.8941  | 0.0018*   |
|                        | P       | 2, 15 | 9.54    | 0.0021*   |
|                        | Cl      | 2, 15 | 13.7965 | 0.0004*   |
|                        | K       | 2, 15 | 5.2153  | 0.0191*   |
| <i>Sa. bullata</i>     | Na      | 2, 12 | 12.2766 | 0.0013*   |
|                        | S       | 2, 12 | 1.1649  | 0.3449    |
|                        | Ca      | 2, 12 | 1       | 0.3966    |
|                        | Mg      | 2, 12 | 27.9277 | < 0.0001* |
|                        | P       | 2, 12 | 0.9795  | 0.4036    |
|                        | Cl      | 2, 12 | 3.9845  | 0.0471*   |
|                        | K       | 2, 12 | 0.8756  | 0.4416    |
| <i>Po. vagabunda</i>   | Na      | 2, 6  | NA      | NA        |
|                        | S       | 2, 6  | 1.6571  | 0.2673    |
|                        | Ca      | 2, 6  | NA      | NA        |
|                        | Mg      | 2, 6  | 33.0909 | 0.0006*   |
|                        | P       | 2, 6  | 1.6946  | 0.261     |
|                        | Cl      | 2, 6  | 2.5936  | 0.1543    |
|                        | K       | 2, 6  | NA      | NA        |
| <i>M. domestica</i>    | Na      | 2, 15 | 1.1446  | 0.3446    |
|                        | S       | 2, 15 | 2.0108  | 0.1684    |
|                        | Ca      | 2, 15 | 1.6701  | 0.2214    |
|                        | Mg      | 2, 15 | 2.325   | 0.132     |
|                        | P       | 2, 15 | 1.8997  | 0.1839    |
|                        | Cl      | 2, 15 | 4.4581  | 0.0302*   |
|                        | K       | 2, 15 | 2.3633  | 0.1282    |
| <i>Sc. stercoraria</i> | Na      | 2, 9  | 1       | 0.4053    |
|                        | S       | 2, 9  | 4.5099  | 0.044*    |
|                        | Ca      | 2, 9  | 2       | 0.1911    |
|                        | Mg      | 2, 9  | 2.6667  | 0.1232    |
|                        | P       | 2, 9  | 9       | 0.0071*   |
|                        | Cl      | 2, 9  | 28.6477 | 0.0001*   |
|                        | K       | 2, 9  | NA      | NA        |
| <i>St. calcitrans</i>  | Na      | 2, 6  | NA      | NA        |

|    |      |        |         |
|----|------|--------|---------|
| S  | 2, 6 | 7.4248 | 0.0238* |
| Ca | 2, 6 | 0.9336 | 0.4436  |
| Mg | 2, 6 | NA     | NA      |
| P  | 2, 6 | 1      | 0.4219  |
| Cl | 2, 6 | 2.2115 | 0.1908  |
| K  | 2, 6 | 1      | 0.4219  |

\* indicates significant differences ( $< 0.05$ ), NA = not applicable and occurs when there were no values recorded

**Supplementary Table S2.** ANOVA results of comparisons of the elemental analysis within region among each species.

| Region | Element | df    | F      | p value    |
|--------|---------|-------|--------|------------|
| 1      | Na      | 7, 31 | 5.6465 | 0.0003     |
|        | Cl      | 7, 30 | 4.393  | 0.0019     |
|        | S       | 7, 31 | 0.6569 | 0.706      |
|        | K       | 7, 31 | 2.2719 | 0.0546     |
|        | Ca      | 7, 31 | 0.7745 | 0.6131     |
|        | Mg      | 7, 31 | 2.0912 | 0.0745     |
|        | P       | 7, 31 | 1.2465 | 0.3084     |
| 2      | Na      | 7, 31 | 2.5132 | 0.0361     |
|        | Cl      | 7, 31 | 4.1934 | 0.0024     |
|        | S       | 7, 31 | 5.35   | 0.0004     |
|        | K       | 7, 31 | 9.5077 | $< 0.0001$ |
|        | Ca      | 7, 31 | 2.352  | 0.0476     |
|        | Mg      | 7, 31 | 0.955  | 0.4802     |
|        | P       | 7, 31 | 3.4901 | 0.0007     |
| 3      | Na      | 7, 31 | 4.5711 | 0.0013     |
|        | Cl      | 7, 31 | 0.8772 | 0.5354     |
|        | S       | 7, 31 | 0.9773 | 0.465      |
|        | K       | 7, 31 | 1.3467 | 0.2625     |
|        | Ca      | 7, 31 | 1.3626 | 0.2558     |
|        | Mg      | 7, 31 | 0.6837 | 0.6847     |
|        | P       | 7, 31 | 1.3787 | 0.2491     |

\* indicates significant differences ( $< 0.05$ ), NA = not applicable and occurs when there were no values recorded
